# Supplementary material for: Polyphyly of Asian Tree Toads, Genus Pedostibes Günther, 1876 (Anura: Bufonidae), and the Description of a New Genus from Southeast Asia
Source: PLoS One. 2016 Jan 20;11(1):e0145903. doi: 10.1371/journal.pone.0145903 (PMC4720419; doi:10.1371/journal.pone.0145903)
Supplement: S2 Table — [34–36] (XLSX) [file pone.0145903.s006.xlsx]

## Sheet: Sheet1
Taxa	male	female	Source
Pelophryne signata	23	25	[4]
Ansonia spinulifer	40	50	[4]
Ghatophryne ornata	29	35	[34]
Sabahphrynus maculatus	39	52.6	[11]
Ingerophrynus divergens	43	52	[4]
Pedostibes tuberculosus	38	42	This study
Adenomus kelaartii	32.6	?	[35]
Duttaphrynus melanostictus	69.3	76.1	[36]
Xanthophryne koynayensis	30	34.3	[34]
Phrynoidis juxtaspera	125	215	[4]
Phyrnoidis aspera	98	121	[4]
Pedostibes rugosus	77	95	[4]; This study
Pedostibes hosii (peninsular)	75	105	[4]; This study
Pedostibes hosii (borneo)	80	105	[4]; This study
